# Supplementary material
Source: publisher figshare collection journal article supplement (https://sage.figshare.com/ndownloader/files/22914758)
Supplement: Supplementary file 1 [file 22914758]

## Supplemental Materials

Table S1. T-tests comparing ADHD, Stress and Depression Measures between genders.

| Measure                    | Gender | n   | M     | SD    | <i>t</i> | 95% CI         | <i>p</i> |
|----------------------------|--------|-----|-------|-------|----------|----------------|----------|
| T1 ADHD-I                  | Male   | 56  | 17.41 | 5.902 | 0.957    | [-0.830-2.395] | .340     |
|                            | Female | 156 | 16.63 | 4.998 |          |                |          |
| T1 ADHD-H                  | Male   | 56  | 14.71 | 5.516 | 1.080    | [-0.731-2.503] | .281     |
|                            | Female | 157 | 13.83 | 5.182 |          |                |          |
| T1 ADHD Overall            | Male   | 56  | 32.13 | 9.669 | 1.077    | [-1.283-4.373] | .283     |
|                            | Female | 157 | 30.58 | 9.053 |          |                |          |
| T1 Dependent Stress (sqrt) | Male   | 56  | 3.409 | 1.184 | -1.311   | [-0.592-0.119] | .191     |
|                            | Female | 155 | 3.645 | 1.146 |          |                |          |
| T1 Depression (sqrt)       | Male   | 57  | 2.526 | 1.167 | -1.137   | [-0.610-0.164] | .257     |
|                            | Female | 154 | 2.749 | 1.299 |          |                |          |
| T2 Dependent Stress (sqrt) | Male   | 56  | 1.597 | 0.588 | -.418    | [-0.275-0.179] | .676     |
|                            | Female | 151 | 1.645 | 0.782 |          |                |          |
| T3 Depression (sqrt)       | Male   | 55  | 2.151 | 1.418 | -1.399   | [-0.771-0.131] | .163     |
|                            | Female | 143 | 2.471 | 1.449 |          |                |          |

Note. T1, time-point 1; T2, time-point 2; T3, time-point 3. ADHD-H, ADHD-I, inattentive ADHD symptoms hyperactive/impulsive ADHD symptoms. \*  $p < .05$ . \*\*  $p < .01$ . Gender coded as female=2, male=1.

## **Cross Sectional Model**

**Cross sectional total effect model** (Table S2 and Figure S1). This model tested the effects of ADHD on depression, controlling for age and gender. Higher ADHD symptom scores significantly predicted higher depressive symptom scores at time-point 1.

**Cross sectional mediation path model** (Table S2 & Figure S1). This model tested the effects of ADHD symptoms on depressive symptoms, mediated by dependent stress, while controlling for age and gender. Higher ADHD scores at baseline significantly predicted higher dependent stress scores and higher dependent stress scores significantly predicted higher depression scores. There was a significant indirect path from ADHD to depression mediated by dependent stress. There was also a significant direct path from ADHD to depression with dependent stress as a mediator. The results of the regression indicated that the variables in this model explained 46.4% of the variance in depressive symptoms.

Table S2. ADHD, Dependent Stress, and Depression Cross-Sectional Mediation Model.

| Outcome Variable                       | Predictor                 | $\beta$ | SE   | Est./SE | $p$   | 95% CI         | $R^2$ |
|----------------------------------------|---------------------------|---------|------|---------|-------|----------------|-------|
| Total Effect Model                     |                           |         |      |         |       |                |       |
| Depression                             | ADHD (c)**                | .545    | .047 | 11.596  | <.001 | [0.450-0.635]  | .318  |
|                                        | Age                       | -.093   | .058 | -1.599  | .110  | [-0.204-0.024] |       |
|                                        | Gender*                   | .138    | .058 | 2.373   | .018  | [0.026-0.255]  |       |
| Mediation Path Model                   |                           |         |      |         |       |                |       |
| Dependent Stress                       | ADHD (a)**                | .453    | .054 | 8.319   | <.001 | [0.342-0.558]  | .220  |
|                                        | Age                       | -.049   | .060 | -0.821  | .412  | [-0.167-0.070] |       |
|                                        | Gender*                   | .135    | .067 | 2.032   | .042* | [0.005-0.264]  |       |
| Depression                             | ADHD (direct effect c')** | .360    | .056 | 6.425   | <.001 | [0.246-0.469]  | .464  |
|                                        | Dependent Stress (b)**    | .419    | .054 | 7.753   | <.001 | [0.308-0.521]  |       |
|                                        | Age                       | -.074   | .052 | -1.440  | .150  | [-0.175-0.028] |       |
|                                        | Gender                    | .083    | .050 | 1.651   | .099  | [-0.017-0.182] |       |
| Mediation Path Model Indirect Effect   |                           |         |      |         |       |                |       |
| ADHD → Dependent Stress → Depression** |                           | .190    | .033 | 5.809   | <.00  | [0.129-0.256]  |       |

Note. \*  $p < .05$ . \*\*  $p < .01$

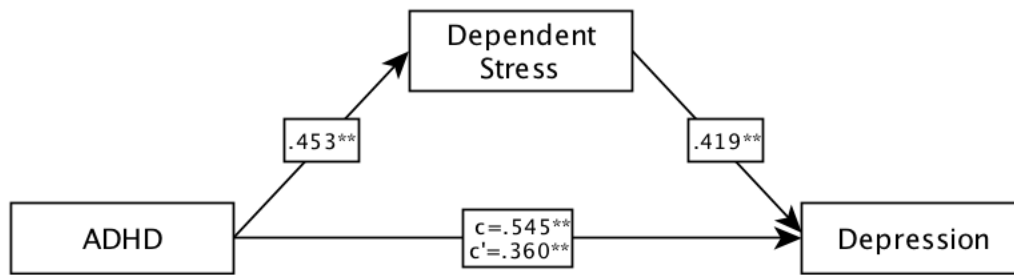

**Figure S1.** Cross-sectional path model with ADHD, dependent stress, and depression at baseline. ADHD symptoms predict depression via the dependent stress indirect pathway.  $** p < .01$ .

## Gender Moderation

Table S3. Gender Moderation of Longitudinal ADHD Symptom Stress Generation and Depression Model.

| Outcome Variable                                  | Predictor                    | $\beta$ | SE   | Est./SE | $p$   | 95% CI         | $R^2$ |
|---------------------------------------------------|------------------------------|---------|------|---------|-------|----------------|-------|
| Longitudinal Total Effect Model                   |                              |         |      |         |       |                |       |
| T3 Depression                                     | T1 ADHD (c)                  | .153    | .091 | 1.675   | .094  | [-0.029-0.327] | .240  |
|                                                   | Gender x T1ADHD              | .101    | .075 | 1.346   | .178  | [-0.044-0.247] |       |
|                                                   | T1 Depression**              | .326    | .083 | 3.944   | <.001 | [0.166-0.492]  |       |
|                                                   | Age                          | .107    | .062 | 1.731   | .083  | [-0.022-0.223] |       |
|                                                   | Gender                       | .092    | .068 | 1.363   | .173  | [-0.044-0.222] |       |
| Longitudinal Mediation Path Model                 |                              |         |      |         |       |                |       |
| T2 Dependent Stress                               | T1 ADHD (a)*                 | .162    | .068 | 2.397   | .017  | [0.026-0.289]  | .359  |
|                                                   | Gender x T1ADHD              | .027    | .064 | 0.426   | .670  | [-0.097-0.152] |       |
|                                                   | T1 Dependent Stress**        | .502    | .061 | 8.245   | <.001 | [0.380-0.617]  |       |
|                                                   | Age                          | .082    | .060 | 1.371   | .171  | [-0.033-0.199] |       |
|                                                   | Gender                       | -.016   | .056 | -0.292  | .771  | [-0.131-0.091] |       |
| T3 Depression                                     | T1 ADHD (direct effect c')   | .113    | .084 | 1.338   | .181  | [-0.056-0.275] | .276  |
|                                                   | T1 Depression**              | .276    | .082 | 3.348   | .001  | [0.117-0.440]  |       |
|                                                   | T2 Dependent Stress (b)**    | .260    | .097 | 2.676   | .007  | [0.049-0.436]  |       |
|                                                   | Gender x T2 Dependent Stress | <.001   | .095 | <0.001  | 1.000 | [-0.177-0.197] |       |
|                                                   | Age                          | .078    | .059 | 1.324   | .185  | [-0.039-0.190] |       |
|                                                   | Gender                       | .073    | .069 | 1.059   | .290  | [-0.065-0.209] |       |
| Longitudinal Mediation Path Model Indirect Effect |                              |         |      |         |       |                |       |
| T1 ADHD → T2 Dependent Stress → T3 Depression     |                              | .042    | .024 | 1.753   | .080  | [0.002-0.094]  |       |

Note. T1, time-point 1; T2, time-point 2; T3, time-point 3. \*  $p < .05$ . \*\*  $p < .01$ . Gender coded as female=1, male=-1.

Table S4. Gender Moderation of Longitudinal ADHD Symptom Stress Generation and Depression Model for Inattentive and Hyperactive/Impulsive Symptom Dimensions

| Outcome Variable                                   | Predictor                     | $\beta$ | SE   | Est./SE | $p$   | 95% CI         | $R^2$ |
|----------------------------------------------------|-------------------------------|---------|------|---------|-------|----------------|-------|
| Inattentive Symptom Dimension                      |                               |         |      |         |       |                |       |
| Longitudinal Total Effect Model                    |                               |         |      |         |       |                |       |
| T3 Depression                                      | T1 ADHD-I (c)                 | .168    | .087 | 1.931   | .053  | [0.001-.0342]  | .247  |
|                                                    | Gender x T1 ADHD-I            | .104    | .077 | 1.341   | .180  | [-0.051-0.252] |       |
|                                                    | T1 Depression**               | .334    | .077 | 4.329   | <.001 | [0.180-0.483]  |       |
|                                                    | Age                           | .091    | .062 | 1.454   | .146  | [-0.038-0.207] |       |
|                                                    | Gender                        | .089    | .067 | 1.325   | .185  | [-0.046-0.216] |       |
| Longitudinal Mediation Path Model                  |                               |         |      |         |       |                |       |
| T2 Dependent Stress                                | T1 ADHD-I (a)*                | .163    | .063 | 2.577   | .010  | [0.037-0.286]  | .358  |
|                                                    | Gender x T1ADHD-I             | .011    | .057 | 0.184   | .854  | [-0.101-0.122] |       |
|                                                    | T1 Dependent Stress**         | .513    | .058 | 8.886   | <.001 | [0.396-0.621]  |       |
|                                                    | Age                           | .073    | .060 | 1.218   | .223  | [-0.043-0.191] |       |
|                                                    | Gender                        | -.018   | .055 | -0.334  | .738  | [-0.132-0.087] |       |
| T3 Depression                                      | T1 ADHD- I (direct effect c') | .126    | .082 | 1.545   | .122  | [-0.036-0.285] | .277  |
|                                                    | T2 Dependent Stress (b)*      | .253    | .098 | 2.587   | .010  | [0.041-0.431]  |       |
|                                                    | Gender x T2 Dependent Stress  | .009    | .096 | 0.091   | .927  | [-0.173-0.209] |       |
|                                                    | T1 Depression**               | .277    | .079 | 3.498   | <.001 | [0.122-.0434]  |       |
|                                                    | Age                           | .073    | .059 | 1.231   | .218  | [-0.046-0.186] |       |
|                                                    | Gender                        | .071    | .068 | 1.046   | .296  | [-0.065-0.204] |       |
| Longitudinal Mediation Path Model Indirect Effects |                               |         |      |         |       |                |       |
| T1 ADHD-I → T2 Dependent Stress → T3 Depression    |                               | .041    | .023 | 1.797   | .072  | [0.002-0.092]  |       |
| Hyperactive/Impulsive Symptom Dimension            |                               |         |      |         |       |                |       |
| Longitudinal Total Effect Model                    |                               |         |      |         |       |                |       |
| T3 Depression                                      | T1 ADHD-H (c)                 | .075    | .084 | 0.894   | .372  | [-0.093-0.236] | .220  |
|                                                    | Gender x T1 ADHD-H            | .072    | .073 | 0.984   | .325  | [-0.073-0.212] |       |
|                                                    | T1 Depression**               | .385    | .077 | 4.967   | <.001 | [0.229-0.535]  |       |
|                                                    | Age                           | .116    | .062 | 1.887   | .059  | [-0.011-0.232] |       |
|                                                    | Gender                        | .081    | .069 | 1.184   | .236  | [-0.058-0.211] |       |
| Longitudinal Mediation Path Model                  |                               |         |      |         |       |                |       |
| T2 Dependent Stress                                | T1 ADHD-H (a)                 | .097    | .064 | 1.511   | .131  | [-0.030-0.224] | .348  |
|                                                    | Gender x T1ADHD-H             | .049    | .065 | 0.761   | .447  | [-0.082-0.170] |       |
|                                                    | T1 Dependent Stress**         | .532    | .060 | 8.885   | <.001 | [0.411-0.646]  |       |
|                                                    | Age                           | .090    | .060 | 1.497   | .135  | [-0.026-0.207] |       |
|                                                    | Gender                        | -.026   | .057 | -0.461  | .645  | [-0.141-0.083] |       |
| T3 Depression                                      | T1 ADHD- H (direct effect c') | .053    | .080 | 0.668   | .504  | [-0.107-0.207] | .268  |
|                                                    | T2 Dependent Stress (b)**     | .280    | .096 | 2.900   | .004  | [0.072-0.455]  |       |
|                                                    | Gender * T2 Dependent Stress  | -.007   | .095 | -0.070  | .944  | [-0.182-0.195] |       |
|                                                    | T1 Depression**               | .307    | .078 | 3.927   | <.001 | [0.155-0.459]  |       |
|                                                    | Age                           | .082    | .059 | 1.380   | .168  | [-0.037-0.194] |       |
|                                                    | Gender                        | .064    | .069 | 0.925   | .355  | [-0.075-0.199] |       |
| Longitudinal Mediation Path Model Indirect Effect  |                               |         |      |         |       |                |       |
| T1 ADHD-H → T2 Dependent Stress → T3 Depression    |                               | .027    | .022 | 1.261   | .207  | [-0.008-0.076] |       |

Note. ADHD-I, inattentive ADHD symptoms; ADHD-H, hyperactive/impulsive ADHD symptoms; T1, time-point 1; T2, time-point 2; T3, time-point 3. \*  $p < .05$ . \*\*  $p < .01$ . Gender coded as female=1, male=-1.

Table S5. Tests for Selective Attrition.

| Measure                    |           | n   | Mean  | SD    | <i>t</i> | df  | p    |
|----------------------------|-----------|-----|-------|-------|----------|-----|------|
| T1 ADHD-I                  | Dropouts  | 14  | 19.64 | 4.396 | 1.869    | 220 | .063 |
|                            | Completed | 208 | 16.90 | 5.371 |          |     |      |
| T1 ADHD-H                  | Dropouts  | 15  | 15.87 | 5.383 | 1.133    | 221 | .259 |
|                            | Completed | 208 | 14.24 | 5.369 |          |     |      |
| T1 ADHD*                   | Dropouts  | 15  | 36.60 | 7.890 | 2.175    | 221 | .031 |
|                            | Completed | 208 | 31.14 | 9.483 |          |     |      |
| T1 Dependent Stress (sqrt) | Dropouts  | 15  | 3.99  | 1.197 | 1.503    | 219 | .134 |
|                            | Completed | 206 | 3.52  | 1.160 |          |     |      |
| T1 Depression (sqrt)       | Dropouts  | 13  | 3.31  | 0.886 | 1.795    | 218 | .074 |
|                            | Completed | 207 | 2.66  | 1.289 |          |     |      |

*Note.* ADHD-I, inattentive ADHD symptoms; ADHD-H, hyperactive/impulsive ADHD symptoms; \*  $p < .05$ .

## Winsorized Analyses

Table S6. Winsorized ADHD, Dependent Stress, and Depression Mediation Model.

| Outcome Variable                                  | Predictor                  | $\beta$ | SE   | Est./SE | $p$   | 95% CI         | $R^2$ |
|---------------------------------------------------|----------------------------|---------|------|---------|-------|----------------|-------|
| Longitudinal Total Effect Model                   |                            |         |      |         |       |                |       |
| T3 Depression                                     | T1 ADHD (c)                | .164    | .084 | 1.942   | .052  | [0.005-0.324]  | .259  |
|                                                   | T1 Depression**            | .386    | .083 | 4.658   | <.001 | [0.224-0.549]  |       |
|                                                   | Age                        | .094    | .060 | 1.566   | .117  | [-0.028-0.209] |       |
|                                                   | Gender                     | .102    | .065 | 1.562   | .118  | [-0.028-0.229] |       |
| Longitudinal Mediation Path Model                 |                            |         |      |         |       |                |       |
| T2 Dependent Stress                               | T1 ADHD (a)**              | .190    | .060 | 3.183   | .001  | [0.071-0.305]  | .396  |
|                                                   | T1 Dependent Stress**      | .516    | .058 | 8.955   | <.001 | [0.401-0.627]  |       |
|                                                   | Age                        | .079    | .057 | 1.390   | .164  | [-0.030-0.192] |       |
|                                                   | Gender                     | -.007   | .052 | -0.143  | .886  | [-0.110-0.092] |       |
| T3 Depression                                     | T1 ADHD (direct effect c') | .100    | .082 | 1.227   | .220  | [-0.063-0.258] | .325  |
|                                                   | T1 Depression**            | .318    | .083 | 3.817   | <.001 | [0.154-0.480]  |       |
|                                                   | T2 Dependent Stress (b)**  | .268    | .065 | 4.125   | <.001 | [0.139-0.392]  |       |
|                                                   | Age                        | .070    | .057 | 1.229   | .219  | [-0.045-0.180] |       |
|                                                   | Gender                     | .084    | .063 | 1.320   | .187  | [-0.042-0.206] |       |
| Longitudinal Mediation Path Model Indirect Effect |                            |         |      |         |       |                |       |
| T1 ADHD → T2 Dependent Stress → T3 Depression*    |                            | .051    | .020 | 2.486   | .013  | [0.016-0.095]  |       |

*Note.* T1, time-point 1; T2, time-point 2; T3, time-point 3. \*  $p < .05$ . \*\*  $p < .01$ . Gender coded as female=2, male=1.

Table S7. Winsorized Longitudinal ADHD Inattentive and Hyperactive/Impulsive Symptom Dimension Stress Generation Mediation Models.

| Outcome Variable                                   | Predictor                     | $\beta$ | SE   | Est./SE | $p$   | 95% CI         | $R^2$ |
|----------------------------------------------------|-------------------------------|---------|------|---------|-------|----------------|-------|
| Inattentive Symptom Dimension                      |                               |         |      |         |       |                |       |
| Longitudinal Total Effect Model                    |                               |         |      |         |       |                |       |
| T3 Depression                                      | T1 ADHD-I (c)*                | .186    | .082 | 2.285   | .022  | [0.023-0.341]  | .266  |
|                                                    | T1 Depression**               | .382    | .078 | 4.876   | <.001 | [0.228-0.533]  |       |
|                                                    | Age                           | .086    | .061 | 1.419   | .156  | [-0.038-0.202] |       |
|                                                    | Gender                        | .099    | .064 | 1.534   | .125  | [-0.028-0.224] |       |
| Longitudinal Mediation Path Model                  |                               |         |      |         |       |                |       |
| T2 Dependent Stress                                | T1 ADHD-I (a)**               | .189    | .059 | 3.190   | .001  | [0.072-0.301]  | .397  |
|                                                    | T1 Dependent Stress**         | .522    | .055 | 9.453   | <.001 | [0.410-0.627]  |       |
|                                                    | Age                           | .071    | .057 | 1.257   | .209  | [-0.038-0.185] |       |
|                                                    | Gender                        | -.011   | .051 | -0.219  | .827  | [-0.112-0.086] |       |
| T3 Depression                                      | T1 ADHD- I (direct effect c') | .126    | .082 | 1.532   | .125  | [-0.039-0.286] | .331  |
|                                                    | T2 Dependent Stress (b)**     | .263    | .064 | 4.098   | <.001 | [0.135-0.385]  |       |
|                                                    | T1 Depression**               | .312    | .080 | 3.882   | <.001 | [0.152-0.467]  |       |
|                                                    | Age                           | .065    | .058 | 1.130   | .259  | [-0.051-0.176] |       |
|                                                    | Gender                        | .083    | .063 | 1.331   | .183  | [-0.044-0.202] |       |
| Longitudinal Mediation Path Model Indirect Effects |                               |         |      |         |       |                |       |
| T1 ADHD-I → T2 Dependent Stress → T3 Depression*   |                               | .050    | .020 | 2.480   | .013  | [0.015-0.093]  |       |
| Hyperactive/Impulsive Symptom Dimension            |                               |         |      |         |       |                |       |
| Longitudinal Total Effect Model                    |                               |         |      |         |       |                |       |
| T3 Depression                                      | T1 ADHD-H (c)                 | .077    | .078 | 0.984   | .325  | [-0.076-0.228] | .245  |
|                                                    | T1 Depression**               | .441    | .076 | 5.770   | <.001 | [0.287-0.587]  |       |
|                                                    | Age                           | .101    | .060 | 1.678   | .093  | [-0.021-0.217] |       |
|                                                    | Gender                        | .088    | .066 | 1.335   | .182  | [-0.043-0.217] |       |
| Longitudinal Mediation Path Model                  |                               |         |      |         |       |                |       |
| T2 Dependent Stress                                | T1 ADHD-H (a)*                | .123    | .057 | 2.146   | .032  | [0.011-0.234]  | .381  |
|                                                    | T1 Dependent Stress**         | .562    | .055 | 10.200  | <.001 | [0.448-0.666]  |       |
|                                                    | Age                           | .082    | .057 | 1.435   | .151  | [-0.027-0.197] |       |
|                                                    | Gender                        | -.017   | .053 | -0.327  | .744  | [-0.122-0.086] |       |
| T3 Depression                                      | T1 ADHD-H (direct effect c')  | .032    | .075 | 0.432   | .666  | [-0.116-0.179] | .315  |
|                                                    | T2 Dependent Stress (b)**     | .287    | .066 | 4.372   | <.001 | [0.155-0.412]  |       |
|                                                    | T1 Depression**               | .353    | .079 | 4.488   | <.001 | [0.195-0.500]  |       |
|                                                    | Age                           | .073    | .057 | 1.263   | .206  | [-0.043-0.183] |       |
|                                                    | Gender                        | .074    | .064 | 1.159   | .246  | [-0.052-0.198] |       |
| Longitudinal Mediation Path Model Indirect Effect  |                               |         |      |         |       |                |       |
| T1 ADHD-H → T2 Dependent Stress → T3 Depression    |                               | .035    | .019 | 1.871   | .061  | [0.003-0.076]  |       |

Note. ADHD-I, inattentive ADHD symptoms; ADHD-H, hyperactive/impulsive ADHD symptoms; T1, time-point 1; T2, time-point 2; T3, time-point 3. \*  $p < .05$ . \*\*  $p < .01$ . Gender coded as female=2, male=1.

Table S8. Winsorized Gender Moderation of Longitudinal ADHD Symptom Stress Generation and Depression Model.

| Outcome Variable                                  | Predictor                    | $\beta$ | SE   | Est./SE | $p$   | 95% CI         | $R^2$ |
|---------------------------------------------------|------------------------------|---------|------|---------|-------|----------------|-------|
| Longitudinal Total Effect Model                   |                              |         |      |         |       |                |       |
| T3 Depression                                     | T1 ADHD (c)                  | .139    | .087 | 1.593   | .111  | [-0.036-0.304] | .269  |
|                                                   | Gender x T1ADHD              | .104    | .069 | 1.501   | .133  | [-0.034-0.237] |       |
|                                                   | T1 Depression**              | .370    | .083 | 4.441   | <.001 | [0.206-0.534]  |       |
|                                                   | Age                          | .104    | .060 | 1.725   | .085  | [-0.020-0.219] |       |
|                                                   | Gender                       | .096    | .066 | 1.453   | .146  | [-0.036-0.224] |       |
| Longitudinal Mediation Path Model                 |                              |         |      |         |       |                |       |
| T2 Dependent Stress                               | T1 ADHD (a)**                | .185    | .065 | 2.844   | .004  | [0.051-0.305]  | .347  |
|                                                   | Gender x T1ADHD              | .016    | .060 | 0.268   | .789  | [-0.098-0.137] |       |
|                                                   | T1 Dependent Stress**        | .514    | .059 | 8.744   | <.001 | [0.397-0.627]  |       |
|                                                   | Age                          | .081    | .058 | 1.402   | .161  | [-0.030-0.194] |       |
|                                                   | Gender                       | -.008   | .052 | -0.152  | .879  | [-0.112-0.092] |       |
| T3 Depression                                     | T1 ADHD (direct effect c')   | .104    | .082 | 1.269   | .205  | [-0.058-0.263] | 1.482 |
|                                                   | T1 Depression**              | .317    | .083 | 3.812   | <.001 | [0.153-0.476]  |       |
|                                                   | T2 Dependent Stress (b)**    | .245    | .090 | 2.729   | .006  | [0.057-0.414]  |       |
|                                                   | Gender x T2 Dependent Stress | .038    | .086 | .443    | .658  | [-0.133-0.208] |       |
|                                                   | Age                          | .068    | .057 | 1.208   | .227  | [-0.046-0.178] |       |
|                                                   | Gender                       | .086    | .065 | 1.315   | .188  | [-0.045-0.210] |       |
| Longitudinal Mediation Path Model Indirect Effect |                              |         |      |         |       |                |       |
| T1 ADHD → T2 Dependent Stress → T3 Depression*    |                              | .045    | .023 | 1.975   | .048  | [0.006-0.094]  |       |

Note. T1, time-point 1; T2, time-point 2; T3, time-point 3. \*  $p < .05$ . \*\*  $p < .01$ . Gender coded as female=1, male=-1.

Table S9. Winsorized Gender Moderation of Longitudinal ADHD Inattentive and Hyperactive/Impulsive Symptom Dimension Stress Generation Models

| Outcome Variable                                   | Predictor                    | $\beta$ | SE   | Est./SE | $p$   | 95% CI         | $R^2$ |
|----------------------------------------------------|------------------------------|---------|------|---------|-------|----------------|-------|
| Inattentive Symptom Dimension                      |                              |         |      |         |       |                |       |
| Longitudinal Total Effect Model                    |                              |         |      |         |       |                |       |
| T3 Depression                                      | T1 ADHD-I (c)                | .162    | .084 | 1.943   | .052  | [-0.002-.0326] | .278  |
|                                                    | Gender x T1 ADHD-I           | .112    | .071 | 1.590   | .112  | [-0.031-0.245] |       |
|                                                    | T1 Depression**              | .368    | .077 | 4.790   | <.001 | [0.216-0.518]  |       |
|                                                    | Age                          | .088    | .061 | 1.442   | .149  | [-0.037-0.202] |       |
|                                                    | Gender                       | .094    | .065 | 1.445   | .148  | [-0.033-0.220] |       |
| Longitudinal Mediation Path Model                  |                              |         |      |         |       |                |       |
| T2 Dependent Stress                                | T1 ADHD-I (a)*               | .188    | .062 | 3.049   | .002  | [0.063-0.302]  | .397  |
|                                                    | Gender x T1ADHD-I            | .005    | .054 | 0.085   | .932  | [-0.098-0.113] |       |
|                                                    | T1 Dependent Stress**        | .521    | .056 | 9.333   | <.001 | [0.408-0.628]  |       |
|                                                    | Age                          | .072    | .057 | 1.253   | .210  | [-0.038-0.186] |       |
|                                                    | Gender                       | -.011   | .051 | -0.220  | .826  | [-0.113-0.086] |       |
| T3 Depression                                      | T1 ADHD-I (direct effect c') | .133    | .081 | 1.637   | .102  | [-0.031-0.290] | .327  |
|                                                    | T2 Dependent Stress (b)*     | .234    | .091 | 2.580   | .010  | [0.045-0.402]  |       |
|                                                    | Gender x T2 Dependent Stress | .047    | .087 | 0.542   | .588  | [-0.126-0.219] |       |
|                                                    | T1 Depression**              | .310    | .080 | 3.888   | <.001 | [0.149-.0463]  |       |
|                                                    | Age                          | .063    | .057 | 1.098   | .272  | [-0.053-0.172] |       |
|                                                    | Gender                       | .086    | .065 | 1.336   | .182  | [-0.045-0.208] |       |
| Longitudinal Mediation Path Model Indirect Effects |                              |         |      |         |       |                |       |
| T1 ADHD-I → T2 Dependent Stress → T3 Depression*   |                              | .044    | .022 | 1.972   | .049  | [0.005-0.093]  |       |
| Hyperactive/Impulsive Symptom Dimension            |                              |         |      |         |       |                |       |
| Longitudinal Total Effect Model                    |                              |         |      |         |       |                |       |
| T3 Depression                                      | T1 ADHD-H (c)                | .059    | .080 | 0.739   | .460  | [-0.101-0.215] | .249  |
|                                                    | Gender x T1 ADHD-H           | .068    | .067 | 1.016   | .310  | [-0.066-0.199] |       |
|                                                    | T1 Depression**              | .431    | .078 | 5.540   | <.001 | [0.274-0.580]  |       |
|                                                    | Age                          | .112    | .060 | 1.849   | .064  | [-0.012-0.227] |       |
|                                                    | Gender                       | .084    | .067 | 1.253   | .210  | [-0.050-0.213] |       |
| Longitudinal Mediation Path Model                  |                              |         |      |         |       |                |       |
| T2 Dependent Stress                                | T1 ADHD-H (a)                | .114    | .062 | 1.841   | .066  | [-0.012-0.233] | .382  |
|                                                    | Gender x T1ADHD-H            | .025    | .061 | 0.402   | .688  | [-0.093-0.146] |       |
|                                                    | T1 Dependent Stress**        | .559    | .057 | 9.878   | <.001 | [0.444-0.666]  |       |
|                                                    | Age                          | .086    | .058 | 1.480   | .139  | [-0.025-0.201] |       |
|                                                    | Gender                       | -.018   | .054 | -0.342  | .733  | [-0.126-0.087] |       |
| T3 Depression                                      | T1 ADHD-H (direct effect c') | .033    | .075 | 0.441   | .659  | [-0.117-0.180] | .312  |
|                                                    | T2 Dependent Stress (b)**    | .270    | .089 | 3.015   | .003  | [0.081-0.436]  |       |
|                                                    | Gender x T2 Dependent Stress | .030    | .086 | .353    | .724  | [-0.140-0.200] |       |
|                                                    | T1 Depression**              | .352    | .079 | 4.485   | <.001 | [0.195-0.501]  |       |
|                                                    | Age                          | .071    | .057 | 1.247   | .212  | [-0.045-0.180] |       |
|                                                    | Gender                       | .076    | .066 | 1.152   | .249  | [-0.056-0.202] |       |
| Longitudinal Mediation Path Model Indirect Effect  |                              |         |      |         |       |                |       |
| T1 ADHD-I → T2 Dependent Stress → T3 Depression    |                              | .031    | .020 | 1.507   | .132  | [-0.003-0.076] |       |

Note. ADHD-I, inattentive ADHD symptoms; ADHD-H, hyperactive/impulsive ADHD symptoms; T1, time-point 1; T2, time-point 2; T3, time-point 3. \*  $p < .05$ . \*\*  $p < .01$ . Gender coded as female=1, male=-1.
